# Supplementary material for: Transmission-selective muscle pathology induced by active propagation of mutant huntingtin across the human neuromuscular synapse
Source: Research Square preprint supplement (doi:10.21203/rs.3.rs-1114693/v1), 2021-12-16
Supplement: Supplementary file 1 [file e78a7d9facd43553c3e9b44a.pdf]

Supplementary Table 1. Summary of statistical analysis for relevant figures.

| Figure | Panel   | Statistical Tests                                                              | Statistical Results                                                                                                                                                                             |
|--------|---------|--------------------------------------------------------------------------------|-------------------------------------------------------------------------------------------------------------------------------------------------------------------------------------------------|
| 1      | e left  | One-way ANOVA with post hoc tests                                              | $F(4,46)=16.69$ , $p<0.0001$<br>Tukey's multiple comparison tests:<br>DCC8 vs. 22: $\text{adj.}p<0.0001$<br>DCC15 vs. 29: $\text{adj.}p=0.0019$                                                 |
| 1      | e right | One-way ANOVA with post hoc tests                                              | $F(4,46)=10.95$ , $p<0.0001$<br>Tukey's multiple comparison tests:<br>DCC8 vs. 22: $\text{adj.}p=0.0082$<br>DCC15 vs. 22: $\text{adj.}p=0.0486$                                                 |
| 1      | g       | Mixed-effects model (REML)                                                     | $F(0.9122, 10.72) = 63.30$ , $p<0.0001$<br>Tukey's multiple comparison tests:<br>DCC4 vs. 7: $\text{adj.}p=0.0017$<br>DCC7 vs. 14: $\text{adj.}p=0.0008$<br>DCC14 vs. 21: $\text{adj.}p=0.0144$ |
| 2      | c       | Chi-squared test                                                               | $X\text{-squared} = 1697.1$ , $df = 3$ , $p< 2.2e-16$                                                                                                                                           |
| 2      | f       | One-way ANOVA with post hoc tests                                              | $F(2,6)=14.94$ , $p<0.0047$<br>Tukey's multiple comparison tests:<br>DCC7 vs. 21: $\text{adj.}p=0.0042$<br>DCC14 vs. 21: $\text{adj.}p=0.0244$                                                  |
| 2      | g       | Kruskal-Wallis rank sum test, two-sided and pairwise Wilcoxon tests, two-sided | Kruskal-Wallis: $p= 2.708e-10$<br>Pairwise Wilcoxon with Benjamini-Hochberg multiple testing correction:<br>DCC7 vs. 15: $\text{adj.}p= 9.7e-08$<br>DCC15 vs. 21: $\text{adj.}p= 1.9e-09$       |
| 3      | b       | One-way ANOVA with post hoc tests                                              | $F(2,6)=30.78$ $p=0.0007$<br>Tukey's multiple comparison tests:<br>bin1 vs. bin2: $\text{adj.}p=0.003$                                                                                          |
| 3      | c       | One-way ANOVA with post hoc tests                                              | $F(2,6)=10.84$ $p=0.01$<br>Tukey's multiple comparison tests:<br>bin1 vs. bin2: $\text{adj.}p=0.04$                                                                                             |
| 3      | e       | Simple Linear Regression                                                       | $R\text{-squared}=0.37$<br>$F(1,18)=10.42$ , $p=0.0047$                                                                                                                                         |
| 3      | f       | Fisher's exact test two sided for DCC7 and 15, Chi-squared test for CCD21      | DCC7 Fisher's exact test: $p=7.214e-09$<br>DCC15: Fisher's exact test: $p<2.2e-16$<br>DCC21: $X\text{-squared}=674.03$ , $df=3$ , $p<2.2e-16$                                                   |
| 4      | c       | Chi-squared test                                                               | $X\text{-squared}=0.2981$ , $df=3$ , $p=0.9604$                                                                                                                                                 |
| 4      | d       | Unpaired t-test, two-sided                                                     | $t=2.749$ , $df=17$ , $p=0.0137$                                                                                                                                                                |
| 4      | e       | Wilcoxon rank sum test, two-sided                                              | $p=0.0141$                                                                                                                                                                                      |
| 4      | f       | Unpaired t-test, two-sided                                                     | $t=3.983$ , $df=4$ , $p=0.0164$                                                                                                                                                                 |
| 4      | g       | Chi-squared test                                                               | $X\text{-squared} = 1.361$ , $df=3$ , $p=0.7147$                                                                                                                                                |
| 4      | i       | Paired t-test, two-sided                                                       | $t=4.641$ , $df=2$ , $p=0.0434$                                                                                                                                                                 |

|   |               |                                   |                                                                                                                                                                             |
|---|---------------|-----------------------------------|-----------------------------------------------------------------------------------------------------------------------------------------------------------------------------|
|   |               |                                   |                                                                                                                                                                             |
| 4 | j             | Wilcoxon rank sum test, two-sided | p=0.0008                                                                                                                                                                    |
| 6 | a Area        | One-way ANOVA with post hoc tests | F(2, 32)=11.82, p=0.0001<br>Dunnett's multiple comparison tests:<br>Neu Ctr-Myo Ctr vs. Neu Ctr-Myo Q72: adj.p=0.0174<br>Neu Ctr-Myo Ctr vs. Neu Q72-Myo Ctr: adj.p<0.0001  |
| 6 | a Length      | One-way ANOVA with post hoc tests | F(2, 34)=10.08, p=0.0004<br>Dunnett's multiple comparison tests:<br>Neu Ctr-Myo Ctr vs. Neu Ctr-Myo Q72: adj.p=0.0042<br>Neu Ctr-Myo Ctr vs. Neu Q72-Myo Ctr: adj.p=0.0004  |
| 6 | a Form factor | One-way ANOVA with post hoc tests | F(2, 34)=5.01, p=0.0124<br>Dunnett's multiple comparison tests:<br>Neu Ctr-Myo Ctr vs. Neu Ctr-Myo Q72: adj.p=0.0424<br>Neu Ctr-Myo Ctr vs. Neu Q72-Myo Ctr: adj.p=0.0127   |
| 6 | b left panel  | two-way ANOVA for each time point | DCC2:<br>DCC2 Fmyo()=, p=<br>DCC2 Fneu()=<br>DCC2 Fmyo:neu()=                                                                                                               |
| 6 | b right panel | two-way ANOVA for each time point |                                                                                                                                                                             |
| 6 | c             | One-way ANOVA with post hoc tests | F (2, 25) = 25.22, p<0.0001<br>Tukey's multiple comparison tests:<br>Neu Ctr-Myo Q72 vs. Neu Q72-Myo Q72: adj.p=0.0003<br>Neu Q72-Myo Ctr vs. Neu Q72-Myo Q72: adj.p<0.0001 |
| 7 | d             | Unpaired t-test, two-sided        | t=9.361, df=4, p=0.0007                                                                                                                                                     |
|   |               |                                   |                                                                                                                                                                             |
